# Supplementary material for: Molecular pathways associated with oxidative stress and their potential applications in radiotherapy (Review)
Source: PubMed Central journal article supplement — Int J Mol Med. 2022 Mar 15;49(5):65. doi: 10.3892/ijmm.2022.5121 (PMC8989428; doi:10.3892/ijmm.2022.5121), 2022-03-15

Figure S1. Analysis of the modifications of the ferroptotic pathway using Kyoto Encyclopedia of Genes and Genomes. The oxidative stress-related genes are highlighted in the red boxes. ROS, reactive oxygen species; AA, arachidonic acid; AdA, adrenic acid; CoA, coenzyme A; GCLC, glutamate-cysteine ligase catalytic subunit; GSS, glutathione synthase; TF, transferrin.

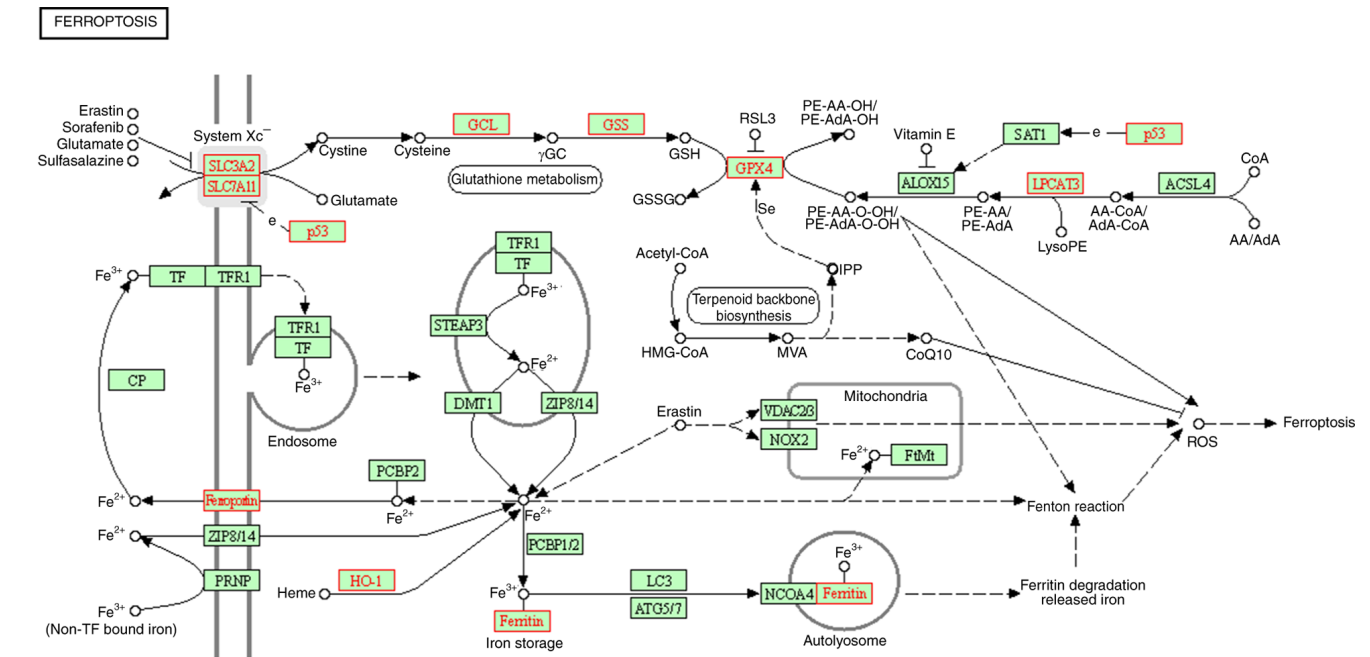

04216 4/12/19  
(c) Kanehisa laboratories



Figure S3. Analysis of the modifications of the FoxO pathway using Kyoto Encyclopedia of Genes and Genomes. The oxidative stress-related genes are highlighted in the red boxes. FoxO, forkhead box protein O.

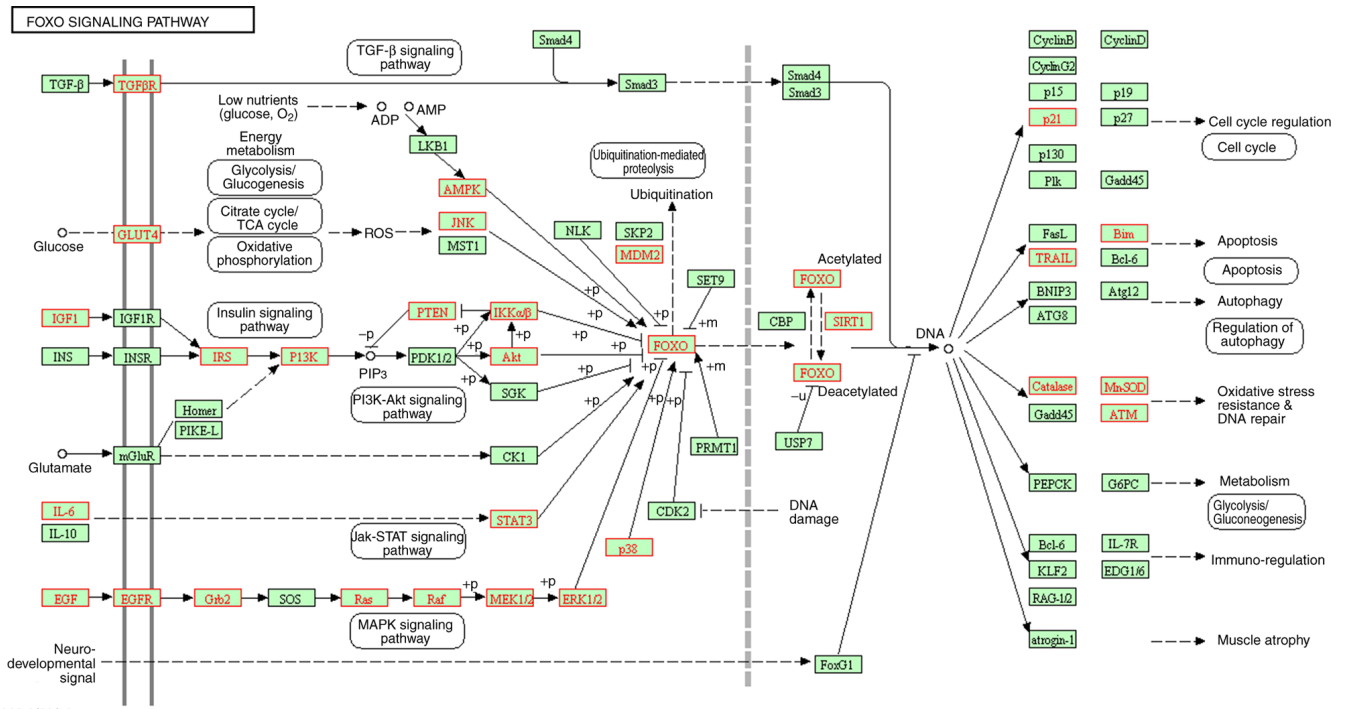

Figure S4. Analysis of the modifications of the ErbB pathway using Kyoto Encyclopedia of Genes and Genomes. The oxidative stress-related genes are highlighted in the red boxes. ErbB, Erb-b receptor tyrosine kinase.

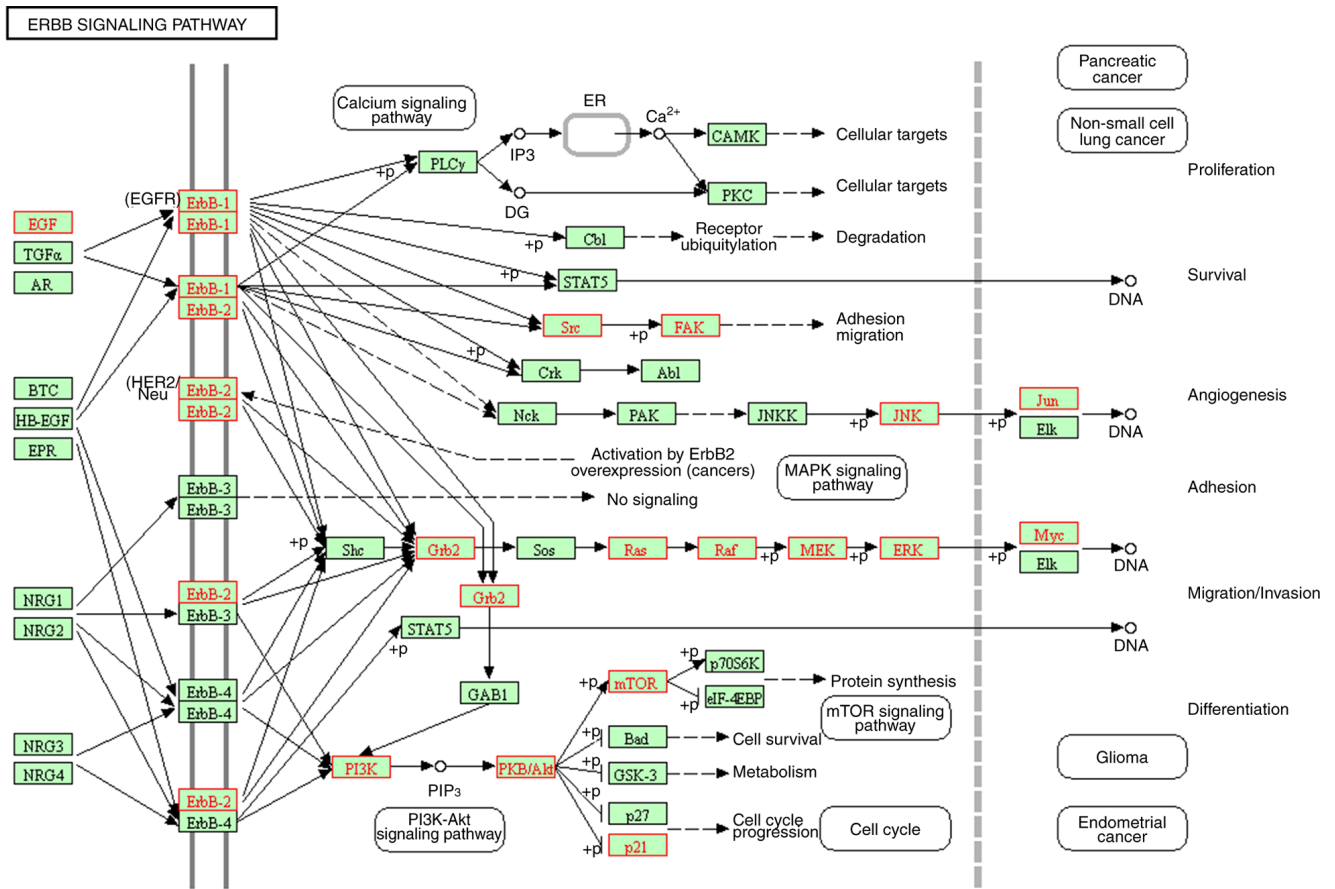

Supplement: Supplementary_Data1.pdf [file Supplementary_Data1.pdf]
