# Supplementary material for: Molecular pathways associated with oxidative stress and their potential applications in radiotherapy (Review)
Source: PubMed Central journal article supplement — Int J Mol Med. 2022 Mar 15;49(5):65. doi: 10.3892/ijmm.2022.5121 (PMC8989428; doi:10.3892/ijmm.2022.5121), 2022-03-15
Supplement: Supplementary_Data2.pdf [file Supplementary_Data2.pdf]

Table SI. List of oxidative stress-associated genes.

| Genes                                                                                                                                                                                                                                                                                                                                                                                                                                                                                                                                                              | (Refs.) |
|--------------------------------------------------------------------------------------------------------------------------------------------------------------------------------------------------------------------------------------------------------------------------------------------------------------------------------------------------------------------------------------------------------------------------------------------------------------------------------------------------------------------------------------------------------------------|---------|
| AP-1, BACH1, FOXO, HIF-1 $\alpha$ , HSF1, NF- $\kappa$ B, NRF2, PGC-1 $\alpha$ , TP53, AMPK, TXN1, TXN2, PRDX6, HO-1, HO-2, FTL1, FTH1, FPN1, NQO1, NQO2, CBR, SIRT3, IDH2, SLC7A11, GCL, CHAC1, TXNRD1, TXNRD2, MTHFD2, ALDH1L2, MTHFD2, PKM2, PI3K, PTEN, KLF9, PRDX1, PRDX3, PRDX4, PRDX5, GPX1, GPX2, SOD1, SOD2, SESN1, SESN2, SESN3, GLS1, GLS2, GSR1, SLC6A9, SRXN1, IDH1, G6PD, ME1, ME2, ME3, PGD, TIGAR, SLC40A1, AKR1B10, AKR1C1, AKR1C3, ALDH3A1, ALDH3B1, CBR1, EPHX1, GSTs, GST1, PTGR1, UGT1A6, KEAP1, GPX4, FASN, SLC16A1, K-RAS, N-RAS, MYC, PIG3 | (3)     |
| AMPK, P38, MAPK, ATM, GLS2, NRF2, SOD2, MDM4, PTEN, AKT, PGC-1 $\alpha$ , TFAM, NRF-1, GLUT1, GLUT4, BCL-2, c-MYC, HSP70, SIRT1, NF- $\kappa$ B, TNF- $\alpha$ , IL-1 $\beta$ , ATF-4, P21, ID2, MDM2, PI3K, MTOR, IGF-1, ERK, FOXO3A, FOXO4, JNK, FAS, TRAIL, BIM, BAX, PERP, TIGAR                                                                                                                                                                                                                                                                               | (4)     |
| IGF-1, IRS, PI3K, Akt, Grb, Shc, MAPK, ET-1, eNOS, TGF- $\beta$ 1, TAK1, MKK3, TRAF6, IKB, IL-1, NF- $\kappa$ B, I $\kappa$ B $\alpha$ , IKK $\alpha$ , IKK $\beta$ , TNF, IL-4, IL-13                                                                                                                                                                                                                                                                                                                                                                             | (5)     |
| APAF-1, ASK1, COX, EGF, EGFR, ERK1, ERK2, FLT3, GPX, GST, HIF-1, IGF-I, JNK, KEAP1, MAPK, MTORC1, NF- $\kappa$ B, NOX, NOXA1, NOXO1, NRF2, PARP, PDGF, PKD, PI3K, PTEN, PINK1, PTPRJ, PRX, TGF $\beta$ , TLR4, TNF $\alpha$ , TNFR1, TRAIL-R1, TRX, SOD                                                                                                                                                                                                                                                                                                            | (12)    |
| PKC, NRF2, MAPK, AP-1, NF- $\kappa$ B, HIF-1 $\alpha$ , c-Jun, ASK1, GPX1, CAT                                                                                                                                                                                                                                                                                                                                                                                                                                                                                     | (19)    |
| MAPK, EGFR, SRX, G6PD, TRX, XCT, AP-1, GCL, HSP90, MTOR, PARP, SOD, CAT, PRX, GR, GPX                                                                                                                                                                                                                                                                                                                                                                                                                                                                              | (26)    |
| KEAP1, PI3K, AKT, NRF2, NF- $\kappa$ B, KRAS, NQO1, NOS3, CDK20, P62, TRAP1, TRIM25, BACH1, NQO1, HMOX1, GCLC, GCLM,                                                                                                                                                                                                                                                                                                                                                                                                                                               | (28)    |

|                                                                                                                                                                                                                                                                      |       |
|----------------------------------------------------------------------------------------------------------------------------------------------------------------------------------------------------------------------------------------------------------------------|-------|
| GPX2, PRDX1, PRDX6, SLC7A11, TXN, TRXR1, TXNIP, SRX1, MAPK, HER1, HER2, ERK1, ERK2, GR, GCL, GSS, GPX3, GSTA1, GSTZ1, GSTM1, GPX4, GPX7, GSTT1, GSTK1, GSTO1                                                                                                         |       |
| NRF2, NF- $\kappa$ B, CAT, GPX, GR, SOD                                                                                                                                                                                                                              | (34)  |
| NRF2, TFRC, ACSL4, NFS1, FTH1, NCOA4, FTH, HMOX1, GPX4, HILPDA, SLC3A2, SLC7A11, MTDH, ATF3, BAP1, IFN $\gamma$ , p53, OTUB1, CD44, NRF2, ARF, BECN1, AMPK, SOCS1, KRAS, GCL, PARK7, TXN, G6PD, ME1, IDH, NOX1, NOX4, STAT3, PHKG2, PEBP1, SRC, HIF-2A, LPCAT3, EGFR | (60)  |
| ERK1, ERK2, P38, MEK, JNK, RAS, RAF, MAPK, EGFR, ER, IGF-1, EGF, NF- $\kappa$ B, FAK, IL-6, GRP78, RASA, TGF-B, AP1, STAT3                                                                                                                                           | (111) |
| MAPK, ERK1, ERK2, PI3K, AKT, HO-1, TRX, FLT3-ITD, NF- $\kappa$ B                                                                                                                                                                                                     | (121) |
| NRF2, KEAP1, NQO1, SRX1, TRXR1, TRX, PRX, CAT-1, SOD-1, ALDH1A1, ALDH2, GR, GPX4, GSTS, GCLC, GCLM, HO-1, IGF-1, NGF $\beta$ , ATF-4, PDGFA                                                                                                                          | (122) |

All reference citations can be found in the main manuscript.
